# Supplementary material for: PIM Kinases as Potential Therapeutic Targets in a Subset of Peripheral T Cell Lymphoma Cases
Source: PubMed Central journal article supplement (PMC4227704; doi:10.1371/journal.pone.0112148), 2014-11-11

Supplementary Figure S5A

Apoptosis induced by pan-PIMi (5  $\mu$ M)

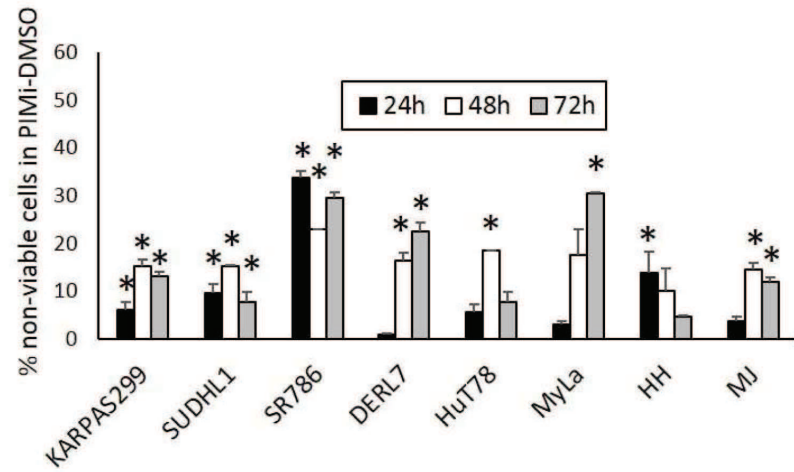

Supplementary Figure S5B

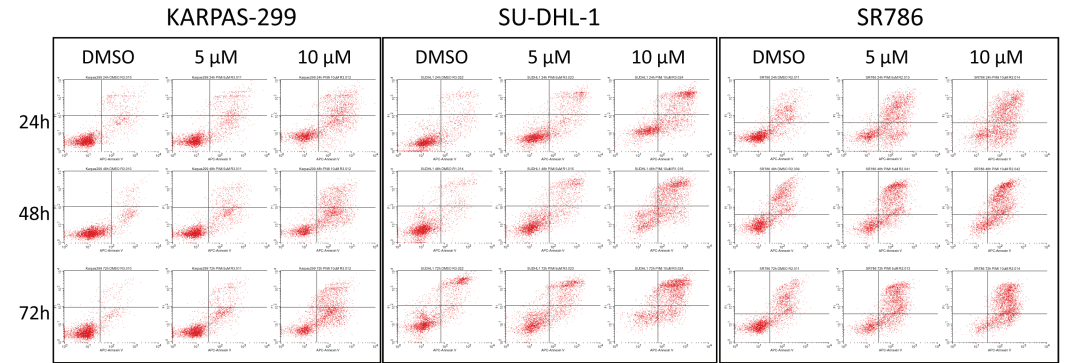

Supplementary Figure S5C

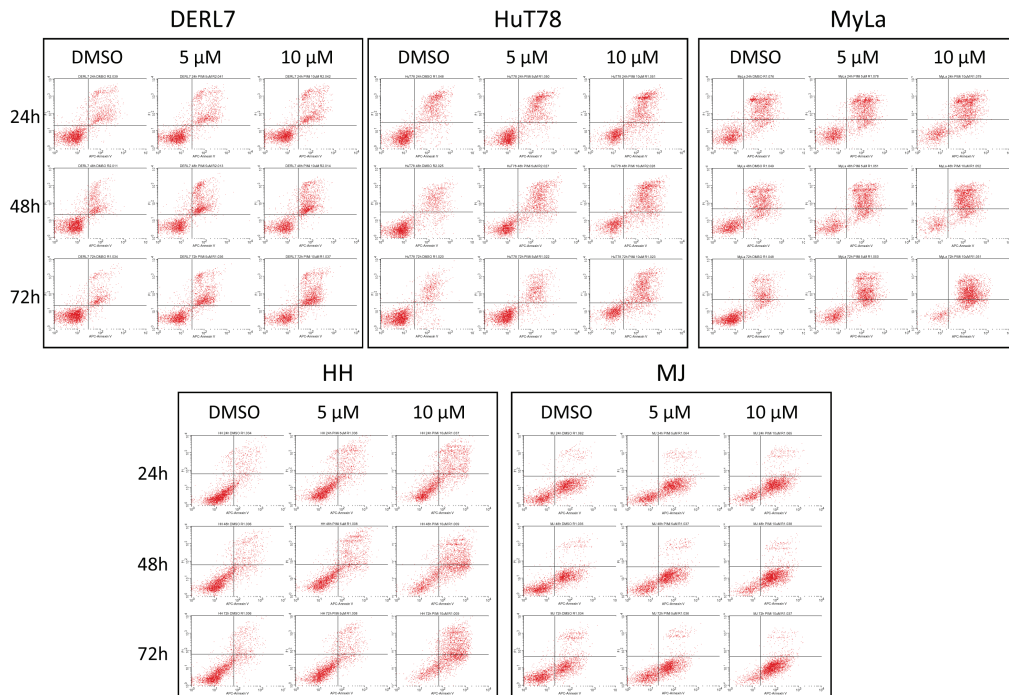

Supplementary Figure S5D

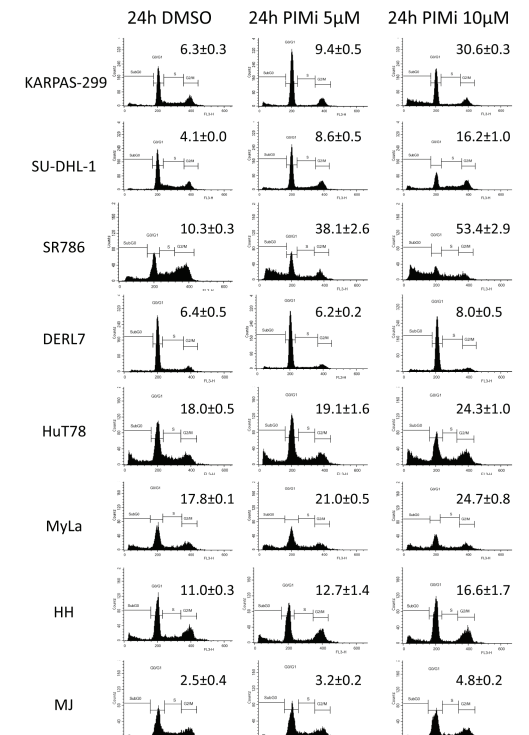

Supplement: pone.0112148.s005.pdf [file pone.0112148.s005.pdf]
